# Supplementary material for: Mechanisms of nucleotide selection by telomerase
Source: eLife. 2020 Jun 5;9:e55438. doi: 10.7554/eLife.55438 (PMC7274783; doi:10.7554/eLife.55438)
Supplement: Supplementary file 1. — The conservation and function of TERT active site residues. Table 1b. Telomerase architecture of five different TERTs, including Homo sapiens, Tetrahymena thermophila,Saccharomyces cerevisiae and Tribolium castaneum. Data from this table used from: (Garforth et al., 2006; Gillis et al., 2008; Jiang et al., 2018; Nguyen et al., 2018; Niederer and Zappulla, 2015). 1TR = Telomerase RNA component *TEN = N terminal domain *TRBD = Telomerase RNA binding domain *RT = Reverse transcriptase domain *CTE = C terminal extension *IFD = Insertion in fingers domain 2 This IFD is truncated compared to other TERTs. [file elife-55438-supp1.xlsx]

## Sheet: Table 1a
Table S1	The conservation and function of TERT active site residues.
H. sapiens	T. castaneum	T. thermophila	S. cerevisiae	Function
D868	D343	D815	D670	Catalytic
D869	D344	D816	D671	Catalytic
D712	D251	D618	D530	Catalytic
R631	R194	R543	E447	Nucleoside binding
Q833	Q308	Q773	Q632	Nucleoside binding
Y717	Y256	Y623	Y535	Nucleoside binding
A716	A255	C622	C534	Triphosphate binding
K902	K372	K849	K704	Triphosphate binding
N899	N369	N846	N701	Triphosphate binding
T714	R253	K620	K532	Triphosphate binding
G715	D254	K621	S533	Triphosphate binding
V713	I252	I619	V531	Triphosphate binding
M636	I199	F548	A453	Templating ribonucleotide binding
N635	S198	T547	I452	Templating ribonucleotide binding
I633	I196	I546	R450	Templating ribonucleotide binding
V634	V197	M546	I451	Templating ribonucleotide binding
R622	N185	R534	R439	Templating ribonucleotide binding
I624	I187	I536	I441	Templating ribonucleotide binding
F568	L141	K483	S388	Templating ribonucleotide binding
G834	G309	G774	G633	Templating ribonucleotide binding
L866	T341	L813	L668	Primer terminus binding
V867	V342	T814	A669	Primer terminus binding

## Sheet: Table 1b
Table S2	Telomerase architecture of five different TERTs, including Homo sapiens, Tetrahymena thermophila, Saccharomyces cerevisiae, and Tribolium castaneum. Data from this table used from: (Garforth, Wu, & Prasad, 2006; Gillis et al., 2008; Jiang et al., 2018; Nguyen et al., 2018; Niederer & Zappulla, 2015).
	TR1 Length (nt)	Domain Structure	TERT Mass (kDa)	Sequence Identity
H. Sapiens	451	TEN-TRBD-RT-IFD-CTE*	127	1
M. musculus	431	TEN-TRBD-RT-IFD-CTE	128	0.62
T. thermophila	159	TEN-TRBD-RT-IFD-CTE	133	0.18
S. cerevisiae	1157	TEN-TRBD-RT-IFD-CTE	103	0.19
T. castaneum	unknown	TRBD-RT-IFD2-CTE	70	0.23
