# Supplementary material for: Mechanisms of nucleotide selection by telomerase
Source: eLife. 2020 Jun 5;9:e55438. doi: 10.7554/eLife.55438 (PMC7274783; doi:10.7554/eLife.55438)
Supplement: Supplementary file 2. — Data collection and refinement statistics for tcTERT structures. [file elife-55438-supp2.xlsx]

## Sheet: Table 2a
Table S3	Data collection and refinement statistics for tcTERT structures.
	Prenucleotide binary complex	Ternary complex	Product complex	Y256A prenucleotide binary complex
Data collection
Wavelength (Å)	1	1	1	1
Space group	P3221	P3221	P3221	P6122
Cell dimensions
a, b, c (Å)	101, 101, 169	97.4 97.4 164	100, 100, 168	101, 101, 379
α, β, γ (°)	90, 90, 120	90, 90, 120	90, 90, 120	90, 90, 120
Resolution (Å)a	48.3-2.54	48.7-2.85	48.1-3.56	48.8-3.40
	(2.65-2.54)	(3.00-2.85)	(3.56-3.90)	(3.67-3.40)
Rmergea	0.07 (2.06)	0.14 (3.41)	0.18 (2.22)	0.19 (7.96)
CC1/2a	0.99 (0.45)	0.99 (0.38)	0.99 (0.51)	0.99 (0.62)
Completeness (%)a	100 (99.9)	100 (99.9)	99.9 (99.1)	99.7 (98.8)
I/σIa	17.8 (0.9)	9.0 (0.5)	7.3 (1.0)	9.0 (0.3)
Redundancya	10.1 (9.0)	10.2 (9.6)	9.8 (9.5)	18.3 (17.2)
Refinement
Resolution (Å)	2.54	2.93	3.56	3.4
No. reflections	33789	21699	12249	16740
Rwork/ Rfree	24.0/26.5	27.0/31.3	26.1/30.4	28.1/29.7
No. atoms
Protein	4895	4750	4866	4890
DNA/RNA	634	634	656	634
Water	47	44	0	1
dGpCpp	N/A	31	N/A	N/A
dGpCpp occupancy	N/A	0.75	N/A	N/A
R.m.s deviations
Bond length (Å)	0.011	0.005	0.013	0.006
Bond angles (º)	1.311	0.834	1.695	1.149
PDB ID	6USO	6USR	6USP	6USQ
aHighest resolution shell is shown in parentheses
