# Supplementary material for: Mechanisms of nucleotide selection by telomerase
Source: eLife. 2020 Jun 5;9:e55438. doi: 10.7554/eLife.55438 (PMC7274783; doi:10.7554/eLife.55438)
Supplement: Supplementary file 3. — Kinetic parameters and errors for tcTERT pre-steady-state kinetics of single nucleotide incorporation. Table 3b. Full kinetic parameters of each curve used to generate Kobs and target engagement values in tcTERT pre-steady-state kinetics [file elife-55438-supp3.xlsx]

## Sheet: Table 3a
Table S4	Kinetic parameters and errors for tcTERT pre-steady-state kinetics of single nucleotide incorporation.
tcTERT variant	Incoming nucleotide	kpol (s-1)	kpol	Kd (μM)	Kd	kpol/Kd	kpol/Kd	Efficiency compared to WT dGTP insertion	Fold change compared to WT dGTP insertion
			Error (s-1)		Error	(s-1 mM-1)	Error
					(μM)		(s-1 mM-1)
WT	dGTP	1.05	3.29 x 10-2	18.1	3.78	58	12.3	1	1	--
R194A	dGTP	3.69 x 10-2	1.67 x 10-3	92.7	10.1	3.98 x 10-1	4.69 x 10-2	6.86 x 10-3	146	Down
Q308A	dGTP	2.97 x 10-1	1.58 x 10-2	44.7	10	6.64	1.53	1.15 x 10-1	8.73	Down
WT	rGTP	3.73 x 10-3	3.19 x 10-4	887	208	4.21 x 10-3	1.05 x 10-3	7.25 x 10-5	1.38 x 104	Down
WT	dATP (mismatch)	8.14 x 10-3	6.71 x 10-4	1.38 x 103	260	5.90 x 10-3	1.21 x 10-3	1.02 x 10-4	9.83 x 103	Down
Y256A	dGTP	6.56	5.19 x 10-1	74.1	17.5	88.5	22	1.53	2.98	Up
Y256A	rGTP	5.56	1.43 x 10-1	73.6	6.21	75.5	6.66	1.3	2.2	Up

## Sheet: Table 3b
Table S5	Full kinetic parameters of each curve used to generate Kobs and target engagement values in tcTERT pre-steady-state kinetics
tcTERT variant	Incoming nucleotide	Nucleotide concentration (μM)	Target engagement (nM)	Target engagement error (nM)	Kobs x 100	Kobs error x 100
WT	dGTP	1	71.1	4.82	5.36	1.59
		5	87.2	2.76	18	2.31
		50	85.5	3.15	82.8	10.4
		100	79.5	4.1	88.6	17.2
		300	73.1	4.92	92.6	20.7
		400	77	6.11	104	27.4
		500	80.9	4.85	100	25
WT	rGTP	100	88.9	4.35	3.18 x 10-2	2.47 x 10-3
		500	93.6	4.59	1.29 x 10-1	1.76 x 10-2
		1000	96.3	0.89	1.99 x 10-1	4.92 x 10-3
		2000	90.6	0.62	2.77 x 10-1	5.25 x 10-3
		3000	91.4	1.03	2.73 x 10-1	8.57 x 10-3
WT	dATP	100	101	1.41	5.22 x 10-2	1.43 x 10-3
		500	100	1.58	2.00 x 10-1	8.50 x 10-3
		1000	99.7	1.63	3.45 x 10-1	1.65 x 10-2
		2000	101	2.59	5.07 x 10-1	4.22 x 10-2
		3000	101	1.52	5.39 x 10-1	2.70 x 10-2
Q308A	dGTP	10	93.7	1.48	3.77	2.33 x 10-1
		50	92.4	1.79	16.8	1.48
		250	93.9	1.82	25.2	2.3
		500	97.3	1.96	27	2.57
R194A	dGTP	10	101	3.02	3.69 x 10-1	3.36 x 10-2
		50	97.5	2.78	1.34	1.46 x 10-1
		100	96.5	0.89	1.85	6.92 x 10-2
		250	96.9	1.34	2.71	1.66 x 10-1
Y256A	dGTP	10	85	3.24	91.5	11.6
		50	87	3.28	231	33
		100	90.8	2.19	406	45.2
		500	84.5	1.89	565	65.6
Y256A	rGTP	10	86	2.12	71.7	5.81
		50	86.4	2.39	213	21.8
		100	88.6	1.98	332	31.7
		250	87.2	1.98	428	45.6
		500	88.5	2.47	484	66.3
